# Supplementary material
Source: PubMed Central journal article supplement (PMC6708598)
Supplement: NIHMS1042368-supplement-Supporting_Info.pdf [file NIHMS1042368-supplement-Supporting_Info.pdf]

## Supporting Materials

### Sortase-Mediated Ligation as a Modular Approach for the Covalent Attachment of Proteins to the Exterior of the Bacteriophage P22 Virus-like Particle.

Dustin Patterson<sup>1\*</sup>, Benjamin Schwarz<sup>2</sup>, John Avera<sup>2</sup>, Brian Western<sup>1</sup>, Matthew Hicks<sup>1</sup>, Paul Krugler<sup>1</sup>, Matthew Terra<sup>1</sup>, Masaki Uchida<sup>2</sup>, Kimberly McCoy<sup>2</sup>, and Trevor Douglas<sup>2\*</sup>

<sup>1</sup>Department of Chemistry & Biochemistry, University of Texas at Tyler, Tyler, TX 75799

<sup>2</sup>Department of Chemistry, Indiana University, Bloomington, IN 47407

#### DNA sequences

##### CP-LPETG

ATGGCTTTGAACGAAGGTCAAATTGTTACTGCGGTAGATGAAATCATCGAAACCATCTCCGCAATC  
ACTCCAATGGCGCAGAAAGCCAAGAAATACACCCGCCTGCTGCTTCTATGCAGCGCTCCAGCAATACC  
ATCTGGATGCCTGTAGAGCAAGAGTCACCCACTCAGGAGGGCTGGGATTTAACTGATAAAGCGACAGG  
GTTACTGGAACCTAACGTCGCGGTAAACATGGGAGAGCCGATAACGACTTCTCCAGTTGCGTGCTGA  
TGACTTGGGAGACGAAACTGCGTATCGTCGCCGCATCCAGTCTGCCGCTCGCAAGCTGGCGAACAACGT  
TGAGTTGAAAGTCGAAACATGGCCGCCGAGATGGGTTTCGCTGGTTATCACCTCCCCTGATGCCATCGG  
CACTAATACCGCAGACGCCTGGAACCTTGTGGCCGACGCAGAAGAAATCATGTTCTCCCGGAACTTAA  
CCGCGACATGGGGACATCGTACTTCTTCAACCCTCAGGACTACAAAAAGCGGGTTACGACCTGACCAA  
GCGTGACATCTTCGGGCGTATTCCTGAAGAAGCATACCGAGATGGCACCATTACAGCGTCAGGTGCGTGG  
CTTCGATGATGTCNTGCGCTCTCCGAACTTCTGTGCTGACCAAATCCACCGCAACTGGCATCACTGTA  
TCCGGTGCGCAGTCCTTCAAGCCTGTCGCATGGCAACTGGATAACGATGGCAACAAAGTTAACGTTGAT  
AACCGTTTTGCTACCGTCACCCTGTCTGCAACTACCGGCATGAAACGCGGCGACAAAATTCGTTTGCTG  
GCGTTAAGTTCCTTGGTCAGATGGCTAAGAACGTACTGGCTCAGGATGCGACTTTCTCCGTAGTCCGCGT  
TGTTGACGGTACTCATGTTGAAATCACGCCGAAGCCGGTAGCGCTGGATGATGTTTCCCTGTCTCCGGA  
GCAGCGTGCCTACGCCAACGTTAACACCTCGCTGGCTGATGCAATGGCAGTGAACATTCTGAACGTTAA  
AGACGCTCGCACTAATGTGTTCTGGGCTGACGATGCTATTCGTATCGTGTCTCAGCCGATTCGGGCTAAC  
CATGAACTTTTTGCAGGTATGAAAACCTCATTACAGCATCCCTGATGTTGGCCTGAACGGTATCTTCGC  
TACGCAGGGTGATATTTCCACCCTGTCCGGCCTGTGCCGTATTGCGCTGTGGTACGGCGTAAACGCGAC  
ACGACCGGAGGCAATCGGTGTTGGCCTGCCTGGTCAGACTGCGAGATCTGCAGGCGGCGGAGGTGCCG  
GAGGAGGTACCCTGCCGAAACCGGCGGTAGCTAACTCGAG

\*underlined is the flexible peptide spacer used and in yellow highlight is the sortase recognition sequence.

##### Polyglycine-GFP

ATGGGCGGAGGAGGCAAGGGGGTGAAGGAAGTAATGAAGATCAGTCTGGAGATGGACTGCACTGTTA  
ACGGCGACAAATTTAAGATCATTGGGGATGGAACAGGAGAACCTTACGAAGGAACACAGACTTTACAT  
CTTACAGAGAAGGAAGGCAAGCCTCTGACGTTTTCTTCGATGTATTGACACCAGCATTTTCAGTATGGAA  
ACCGTACATTCACCAATACCCAGGCAATATAACGACTTTTTCAAGCAGACCGTTTTCTGGTGGCGGGTA

TACCTGGGAGCGAAAAATGACTTATGAAGACGGGGGCATAAGTAACGTCCGAAGCGACATCAGTGTGA  
AAGGTGACTCTTTCTACTATAAGATTCACTTCACTGGCGAGTTTCCTCCTCATGGTCCAGTGATGCAGAG  
GAAGACAGTAAAATGGGAGCCATCCACTGAAGTAATGTATGTTGACGACAAGAGTGACGGTGTGCTGA  
AGGGAGATGTCAACATGGCTCTGTTGCTTAAAGATGGCCGCCATTTGAGAGTTGACTTTAACACTTCTTA  
CATACCCAAGAAGAAGGTCGAGAATATGCCTGACTACCATTTTATAGACCACCGCATTGAGATTCTGGG  
CAACCCAGAAGACAAGCCGGTCAAGCTGTACGAGTGTGCTGTAGCTCGCTATTCTCTGCTGCTGAGAA  
GAACAAGGGATCCGGCGGACTGGTGCCGCGCGGCAGCGGACATCACCATCATCACCCTAA

MBP-HAhead (pRK793)

ATGAAAATCGAAGAAGGTAAACTGGTAATCTGGATTAACGGCGATAAAGGCTATAACGGTCTCGCTGA  
AGTCGGTAAGAAATTCGAGAAAGATACCGGAATTAAGTCACCGTTGAGCATCCGGATAAACTGGAAG  
AGAAATCCACAGGTTGCGGCAACTGGCGATGGCCCTGACATTATCTTCTGGGCACACGACCGCTTTG  
GTGGCTACGCTCAATCTGGCCTGTTGGCTGAAATCACCCCGACAAAGCGTTCAGGACAAGCTGTATC  
CGTTTACCTGGGATGCCGTACGTTACAACGGCAAGCTGATTGCTTACCCGATCGCTGTTGAAGCGTTATC  
GCTGATTTATAACAAAGATCTGCTGCCGAACCCGCCAAAAACCTGGGAAGAGATCCCGGCGCTGGATAA  
AGAAGTAAAAGCGAAAGGTAAGAGCGCGCTGATGTTCAACCTGCAAGAACCGTACTTCACCTGGCCGCT  
GATTGCTGCTGACGGGGTATGCGTTCAAGTATGAAAACGGCAAGTACGACATTAAGACGTGGGGCG  
TGGATAACGCTGGCGCGAAAGCGGGTCTGACCTTCTGGTTGACCTGATTAAAAACAAACACATGAATG  
CAGACACCGATTACTCCATCGCAGAAGCTGCCTTAATAAAGGCGAAACAGCGATGACCATCAACGGCC  
CGTGGGCATGGTCCAACATCGACACCAGCAAAGTGAATTATGGTGTAAACGGTACTGCCGACCTTCAAGG  
GTCAACCATCCAAACCGTTTCGTTGGCGTGCTGAGCGCAGGTATTAACGCCGCCAGTCCGAACAAAGAGC  
TGGCAAAGAGTTCCTCGAAAACCTATCTGCTGACTGATGAAGGTCTGGAAGCGGTTAATAAAGACAAAC  
CGCTGGGTGCCGTAGCGCTGAAGTCTTACGAGGAAGAGTTGGCGAAAGATCCACGTATTGCCGCCACC  
ATGGAAAACGCCAGAAAGGTGAAATCATGCCGAACATCCCGCAGATGTCCGCTTTCTGGTATGCCGTG  
CGTACTGCGGTGATCAACGCCGCCAGCGGTCGTCAGACTGTCGATGAAGCCCTGAAAGACGCGCAGAC  
TAATTCGAGCTCGgaaaatctgtactttcaaggtGGCGGCGGTGCAAGCAAGGGCATCGCACCGCTGCAGCTG  
GGTAAATGCAATATTGCTGGTTGGCTGCTGGGCAACCCGGAATGTGATCCGCTGCTGCCGGTCCGCAGC  
TGGTCTTATATTGTGAAACCCCGAATAGCGAAAACGGTATCTGCTATCCGGGCGATTTCAATTGACTACG  
AAGAACTGCGTGAACAACCTGAGCAGCGTGAGCAGCTTTGAACGCTTCGAAATCTTCCGAAAGAATCAT  
CGTGGCCGAACCATAATAACCAACGGCGTTACGGCGGCCTGTAGCCACGAAGGTAAAAGCAGCTTTTATC  
GTAATCTGCTGTGGCTGACCGAAAAAGAAGGTAGTTATCCGAAACTGAAGAATTCCTACGTGAACAAAA  
AGGGCAAGGAAGTTCTGGTCTGTGGGGTATCCATCACCCGCCGAATAGCAAAGAACAGCAAAACCTG  
TATCAGAATGAAAACGCGTACGTTAGTGTGGTTACCTCCAATTATAACCGTCGCTTCACGCCGAAATTG  
CGGAACGTCCGAAGGTCCGCGATCAAGCCGGTTCGTATGAACTATTACTGGACCCTGCTGAAACCGGGC  
GACACGATTATCTTTGAAGCGAATGGTAACTGATCGCCCCGATGTACGCGTTCCGCTGTACGCGGGT  
TTGGTTCGGGCATTATCACCAGTGGATCCGGCGGACTGGTGCCGCGCGGCAGCGGACATCACCATCATC  
ACCACTAA

\*lowercase lettering indicates the sequence encoding the TEV protease cleavage site

## Protein Sequences

CP-LPETG

MALNEGQIVTLAVDEIIETISAITPMAQKAKKYTPPAASMQRSSNTIWMMPVEQESPTQEGWDLTDKATGLLE  
LNVAVNMGEPDNDFFQLRADDLRDETAYRRRIQSAARKLANNVELKVANMAAEMGSLVITSPDAIGTNTA  
DAWNFVADAEIIMFSRELNDRDMGTSYFFNPQDYKKAGYDLTKRDIFGRIPEEAYRDGTIQRQVAGFDDVXR  
SPKLPVLTKSTATGITVSGAQSFKPVAVQLDNDGKNVVDNRFATVTLSTATTGMKRGDKISFAGVKFLGQM  
AKNVLAQDATFSVVRVVDGTHVEITPKPVALDDVLSPEQRAYANVNTSLADAMAVNILNVKDARTNVFW  
ADDAIRIVSQPIPANHELFAAGMKTTTSFSIPDVGLNGIFATQGDISTLSGLCRIALWYGVNATRPEAIGVGLPGQ  
TARSAGGGGAGGGTLPETGGS

\*underlined is the flexible peptide spacer used and in yellow highlight is the sortase recognition sequence.

Poly-glycine-GFP-6xHis

GGGGKGVKEVMKISLEMDCTVNGDKFKIIGDGTGEPYEGTQTLHLTEKEGKPLTFSFDVLTAPAFQYGNRTFTK  
YPGNIPDFFKQTVSGGGYTWERKMTYEDGGISNVRSDISVKGDSFYKIHFTGEFPPHGPVMQRKTVKWEK  
STEVMYVDDKSDGVLKGDVNMALLLKDGRHLRVDFNTSYIPKKKVENMPDYHFIDHRIEILGNPEDKPKVLY  
ECAVARYSLLPEKNKGSGGLVPRGSGHHHHHH

MBP-Poly-glycine-HA-6xHis pRK793

MKIEEGKLVWINGDKGYNGLAEVGGKFEKDTGIKVTVEHPDKLEEKFPQVAATGDGPDIIFWAHDHDFGGYA  
QSGLLAEITPDKAFQDKLYPFTWDVAVRYNGKLIAYPIAVEALSLIYNKDLLPNPPKTWEEIPALDKELKAKGKSA  
LMFNLQEPYFTWPLIAADGGYAFKYENGYDIKDVGVNAGAKAGLTLVDLIKNKHMNADTDYSIAEAAF  
NKGETAMTINGPWAWSNIDTSKVNYGVTVLPTFKGQPSKPFVGVLSAGINAASPNKELAKEFLENYLLTDEG  
LEAVNKDKPLGAVALKSYYEELAKDPRIAATMENAQKGEIMPNIQMSAFWYAVRTAVINAASGRQTVDEA  
LKDAQTNSSSENLYFQGGGASKGIAPLQLGKCNIAGWLLGNPECDPLLPVRSWSYIVETPNSENGICYPGDF  
IDYEELREQLSSVSSFERFEIFPKESSWPNHNTNGVTAACSHGKSSFYRNLLWLTEKEGSYPKLNKSYVNKKG  
KEVLVLWGIHPPNSKEQQNLYQENAYVSVVTSNYNRRFTPEIAERPQVRDQAGRMNYYWTLLKPGDTIIF  
EANGNLIAPMYAFALSRGFGSGGIITSGSGGLVPRGSGHHHHHH

\*underlined portion is the recognition sequence for TEV protease cleavage after residue Q

Cleaved PolyG-HAhead

GGGGASKGIAPLQLGKCNIAGWLLGNPECDPLLPVRSWSYIVETPNSENGICYPGDFIDYEELREQLSSVSSFE  
RFEIFPKESSWPNHNTGVTAACSHGKSSFYRNLLWLTEKEGSYPKLNKSYVNKKGKEVLVLWGIHPPNSKE  
QQNLYQENAYVSVVTSNYNRRFTP EIAERPQVRD QAGRMNYYWT LLKPGDTIIF EANGNLIAPM  
YAFALSRGFGSGGIITSGSGG LVPRGSGHHH HHH

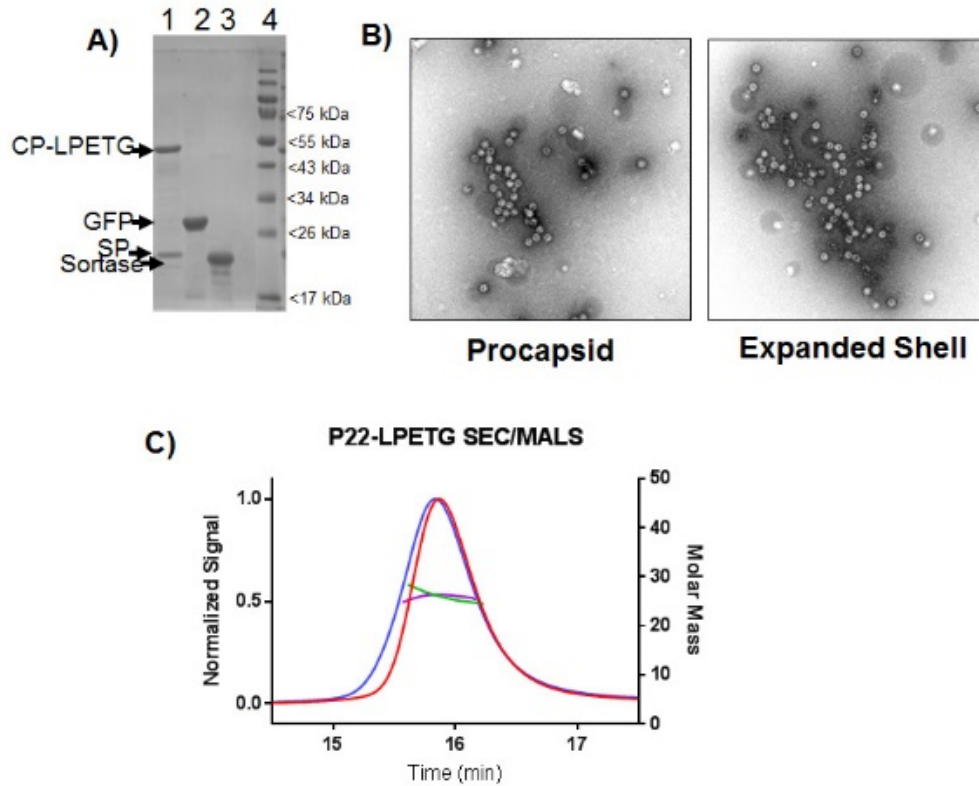

**Figure S1. Characterization of purified P22-LPETG VLPs, polyG-GFP, and Sortase.** A) SDS-PAGE gel of purified P22-LPETG, polyG-GFP, and Sortase. B) Transmission electron microscopy images of the procapsid and expanded shell P22-LPETG VLPs. C) Size exclusion chromatography elution profiles and multiangle light scattering analysis of PC P22-LPETG (red and green) and EX P22-LPETG (blue and purple).

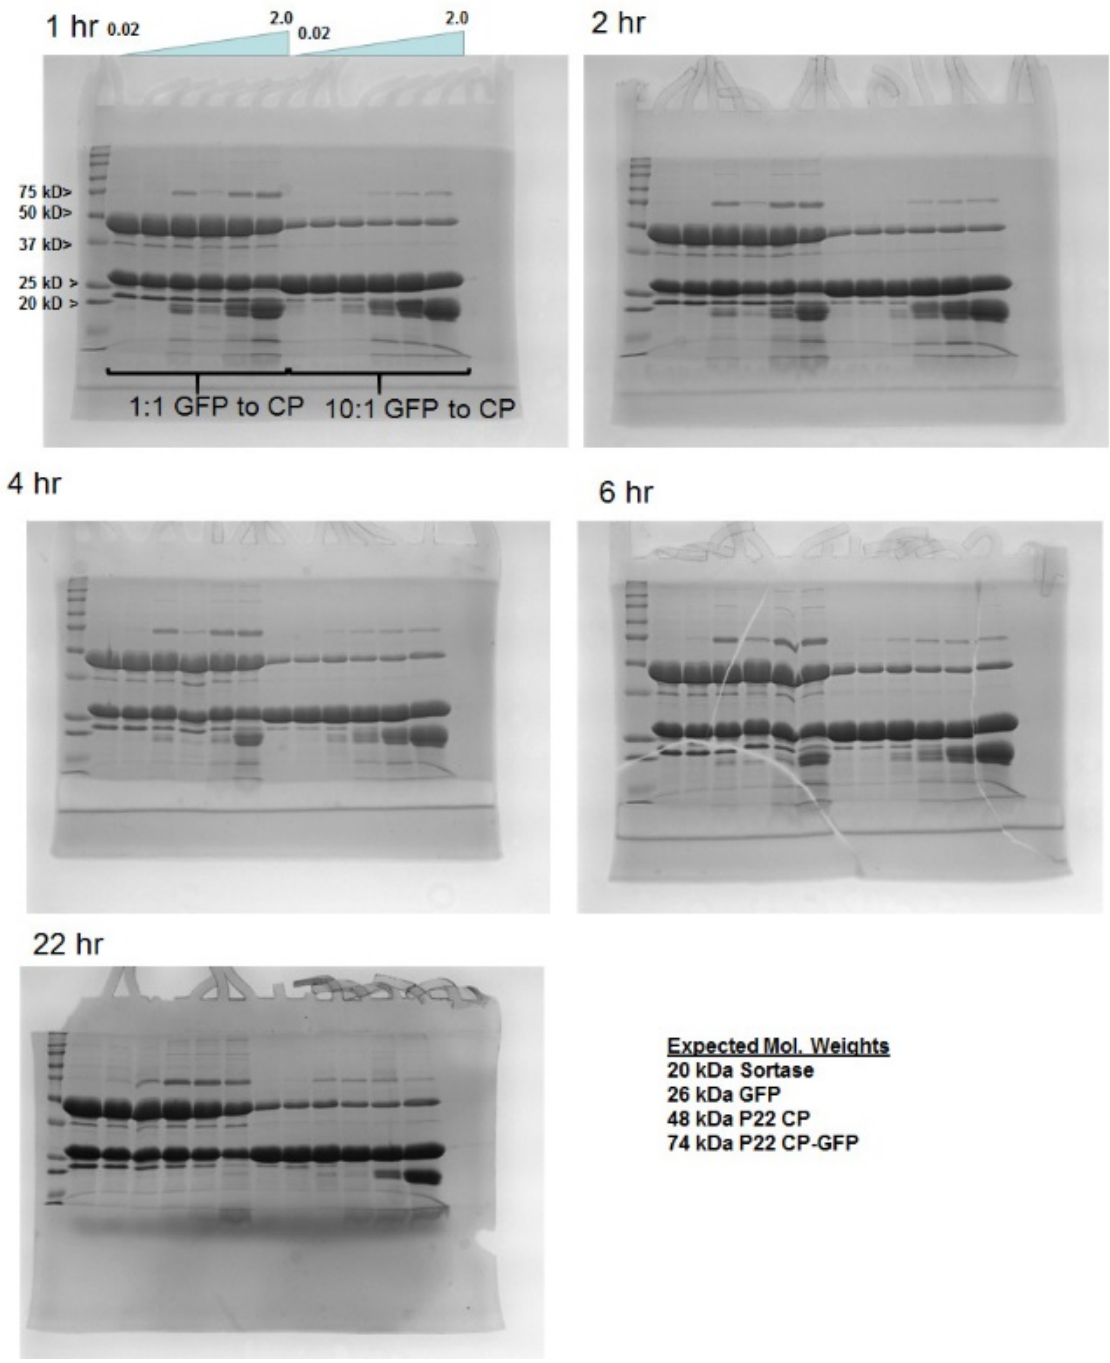

**Figure S2. Sortase mediated ligation of polyG-GFP to PC P22-LPETG.** SDS-PAGE gels of samples taken at different time points evaluating ligation reactions conditions of different ratios of Sortase to reactants and polyG-GFP to P22 CP-LPETG.

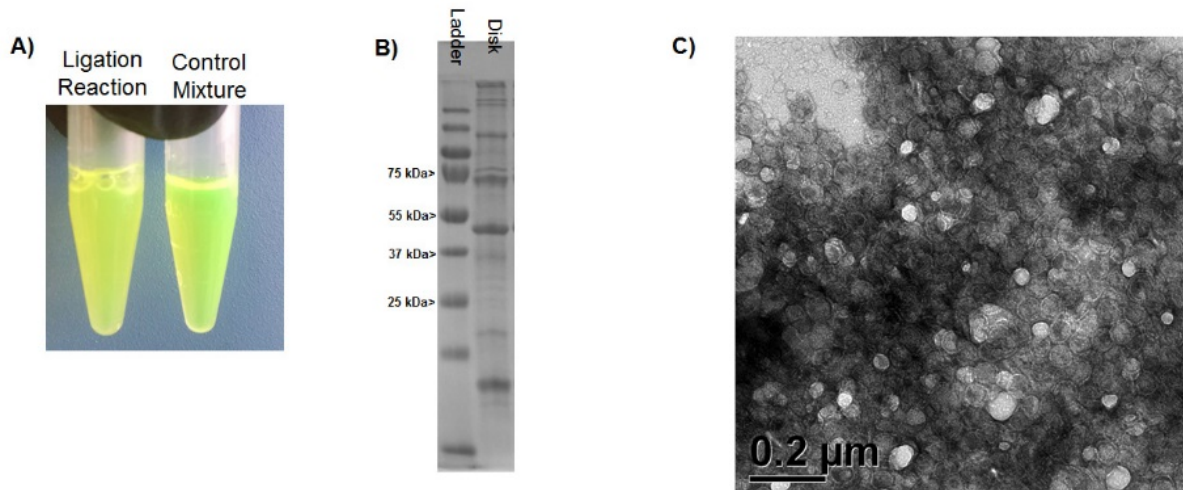

**Figure S3. Evaluation of reaction mixtures and products of cesium chloride purification.** A) Sortase mediated ligation reaction mixtures showed more increased turbidity in comparison with non-ligated reaction mixtures. B) SDS-PAGE analysis of protein disks produced from cesium chloride gradient purification contains cross-linked P22-GFP. C) TEM image obtained from the protein disk.

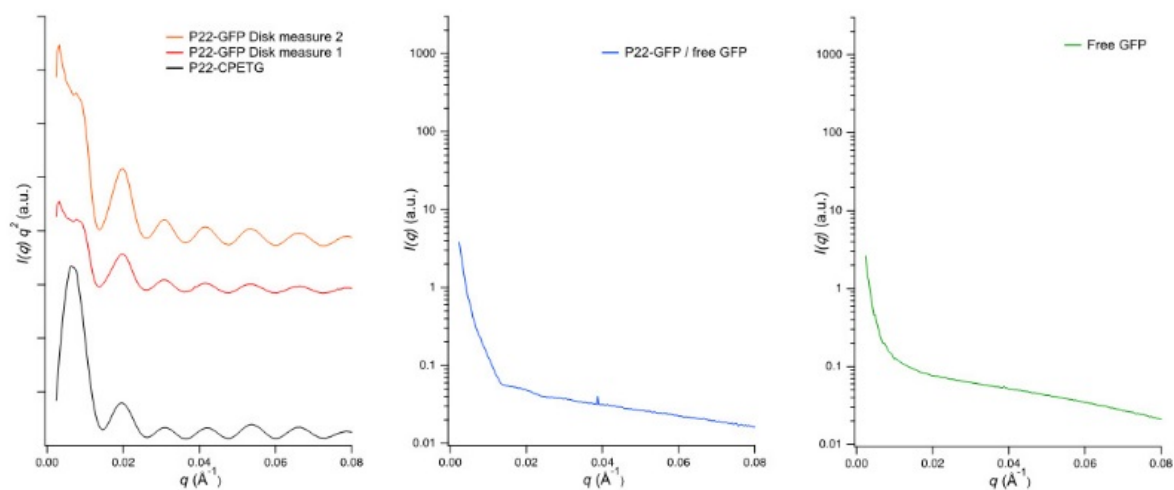

**Figure S4. Small angle x-ray scattering of P22-GFP VLP disks and control samples.**

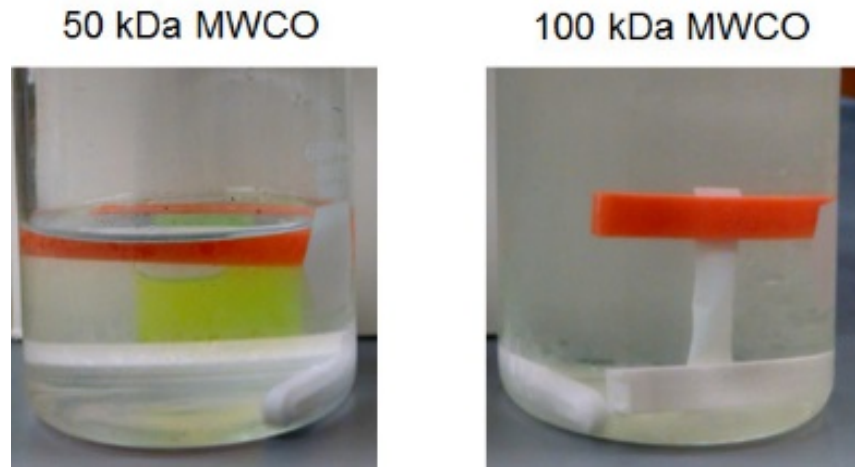

**Figure S5. Evaluation of the ability to remove free polyG-GFP by dialysis.** 50 kDa molecular weight cutoff (MWCO) dialysis tubing was found to retain most of the free polyG-GFP, whereas 100 kDa MWCO dialysis tubing allow exchange and removal of GFP after two exchanges.

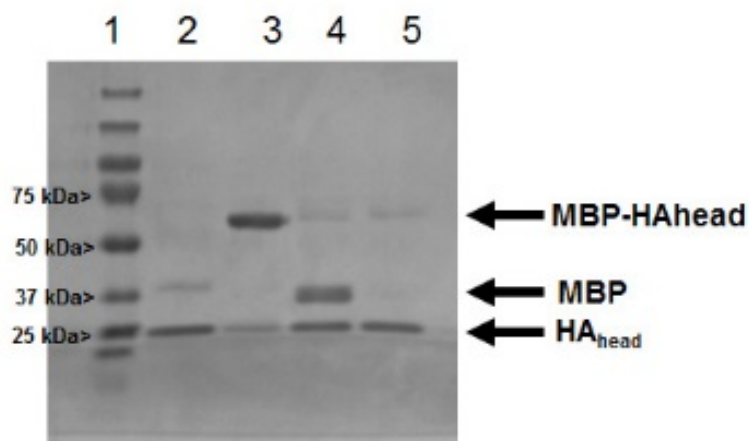

**Figure S6. Preparation of polyG-HAhead from the MBP-HAhead fusion protein.** SDS-PAGE gel analysis for TEV protease (lane 2), MBP-HAhead (lane 3), MBP-HAhead treated with catalytic amount of TEV (lane 4) and purified polyG-HAhead (lane 5). Expected molecular weights are: MBP-HAhead (68.9 kDa), MBP (43.9 kDa), and HAhead (25 kDa).
